# Supplementary material for: SgNramp1, a plasma membrane-localized transporter, involves in manganese uptake in Stylosanthes guianensis
Source: PubMed Central journal article supplement (PMC9583531; doi:10.3389/fpls.2022.1027551), 2022-10-06
Supplement: DataSheet_1.pdf [file DataSheet_1.pdf]

# Supplementary Figure S1

A

| Proteins | SgNramp1 | SgNramp2 | SgNramp3 | SgNramp4 | SgNramp5 |
|----------|----------|----------|----------|----------|----------|
| SgNramp1 | 100.0%   | 32.7%    | 35.0%    | 81.2%    | 55.9%    |
| SgNramp2 | 32.7%    | 100.0%   | 73.7%    | 33.3%    | 32.1%    |
| SgNramp3 | 35.0%    | 73.7%    | 100.0%   | 31.8%    | 34.3%    |
| SgNramp4 | 81.2%    | 33.3%    | 31.8%    | 100.0%   | 60.0%    |
| SgNramp5 | 55.9%    | 32.1%    | 34.2%    | 60.0%    | 100.0%   |

B

| Proteins | AtNramp1 |
|----------|----------|
| SgNramp1 | 75.9%    |
| SgNramp2 | 32.1%    |
| SgNramp3 | 33.9%    |
| SgNramp4 | 77.0%    |
| SgNramp5 | 56.2%    |

C

| Proteins | MtNramp1 |
|----------|----------|
| SgNramp1 | 57.2%    |
| SgNramp2 | 35.9%    |
| SgNramp3 | 36.3%    |
| SgNramp4 | 48.2%    |
| SgNramp5 | 76.0%    |

D

| Proteins | GmDMT1 |
|----------|--------|
| SgNramp1 | 34.1%  |
| SgNramp2 | 72.9%  |
| SgNramp3 | 81.8%  |
| SgNramp4 | 31.5%  |
| SgNramp5 | 34.1%  |
