# Supplementary material for: SgNramp1, a plasma membrane-localized transporter, involves in manganese uptake in Stylosanthes guianensis
Source: PubMed Central journal article supplement (PMC9583531; doi:10.3389/fpls.2022.1027551), 2022-10-06

Supplementary Figure S3

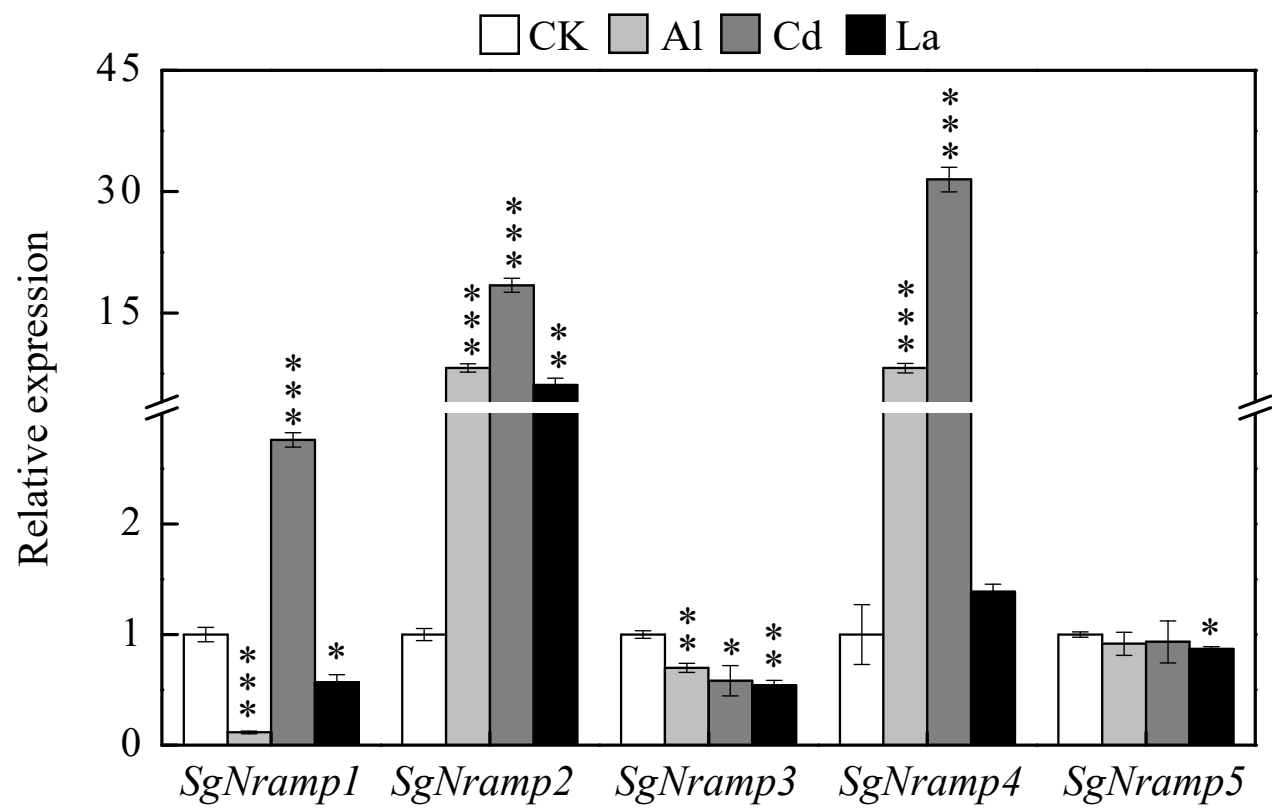

Supplement: DataSheet_3.pdf [file DataSheet_3.pdf]
